# Supplementary material for: Climatic and Biological Factors Related with Goat Grazing Management in the Arid Grassland of the Coquimbo Region (Northern Chile)
Source: MDPI journal article supplement (doi:10.3390/ecologies2040020), 2021-10-21
Supplement: s1 [file s1]

## Document S1

Allochthonous species detected during sampling (1983–2002) in CEALC (A: Annual, B: Biannual, Pe: Perennial).

| Botanical Family | Life Form | Species                                                                                                                                                                                       |
|------------------|-----------|-----------------------------------------------------------------------------------------------------------------------------------------------------------------------------------------------|
| ASTERACEAE       | A         | <i>Anthemis cotula</i> L., <i>Xanthium spinosum</i> L.                                                                                                                                        |
|                  | A–B       | <i>Calendula officinalis</i> L., <i>Sonchus asper</i> (L.) Hill.                                                                                                                              |
|                  | Pe        | <i>Cichorium intybus</i> L., <i>Hypochaeris radicata</i> L., <i>Taraxacum officinale</i> Weber ex F.H. Wig.                                                                                   |
| BORAGINACEAE     | A         | <i>Anchusa arvensis</i> L.                                                                                                                                                                    |
|                  | A–B       | <i>Borago officinalis</i> L.                                                                                                                                                                  |
| BRASSICACEAE     | A         | <i>Brassica nigra</i> (L.) W.D.J.Koch, <i>Capsella bursapastoris</i> (L.) Medik., <i>Lepidium bonariense</i> L.                                                                               |
|                  |           | <i>Rapistrum rugosum</i> (L.) All., <i>Sisymbrium orientale</i> L.                                                                                                                            |
| CARYOPHYLLACEAE  | Pe        | <i>Cerastium arvense</i> L.                                                                                                                                                                   |
| CARYOPHYLLACEAE  | A         | <i>Herniaria cinerea</i> DC., <i>Silene gallica</i> L., <i>Spergula arvensis</i> L.                                                                                                           |
|                  | Pe        | <i>Spergularia media</i> (L.) K. Presl. ex Gr.                                                                                                                                                |
| CONVOLVULACEAE   | A         | <i>Stellaria media</i> (L.) Cirillo.                                                                                                                                                          |
|                  | Pe        | <i>Convolvulus arvensis</i> L.                                                                                                                                                                |
| FABACEAE         | A         | <i>Medicago polymorpha</i> L., <i>Melilotus indicus</i> (L.) All.                                                                                                                             |
| GERANIACEAE      | A         | <i>Erodium cicutarium</i> (L.) L' Hér. ex Ait., <i>Erodium malacoides</i> (L.) L' Hér. ex Ait.                                                                                                |
|                  |           | <i>Erodium moschatum</i> (L.) L' Hér. ex Ait.                                                                                                                                                 |
| MALVACEAE        | A         | <i>Anoda cristata</i> L., <i>Malva parviflora</i> L.                                                                                                                                          |
|                  | Pe        | <i>Malva nicaensis</i> All.                                                                                                                                                                   |
| PLANTAGINACEAE   | Pe        | <i>Plantago lanceolata</i> L.                                                                                                                                                                 |
| POACEAE          | A         | <i>Avena barbata</i> Pott. ex Link., <i>Lamarckia aurea</i> (L.) Moench., <i>Rostraria cristata</i> (L.) Tzvelev., <i>Schismus arabicus</i> Nees., <i>Setaria verticillata</i> (L.) P.Beauv., |
|                  |           | <i>Vulpia bromoides</i> (L.) Gray., <i>Vulpia myuros</i> (L.) C.C. Gmel.                                                                                                                      |
|                  | Pe        | <i>Phleum pratense</i> L., <i>Sorghum halepense</i> (L.) Pers.                                                                                                                                |
| PRIMULACEAE      | A         | <i>Anagallis arvensis</i> L.                                                                                                                                                                  |
| RUBIACEAE        | A         | <i>Galium aparine</i> L.                                                                                                                                                                      |
| SCROPHULARIACEAE | A         | <i>Linaria texana</i> Scheele.                                                                                                                                                                |
| SOLANACEAE       | A         | <i>Solanum nigrum</i> L.                                                                                                                                                                      |

Native species of Chile detected during sampling (1983–2002) in CEALC (A: Annual, B: Biannual, Pe: Perennial, Ph: Phanerophyte, S: Subfruticose).

| Botanical Family | Life Form | Species                                                                                                                                                                 |
|------------------|-----------|-------------------------------------------------------------------------------------------------------------------------------------------------------------------------|
| ADIANTACEAE      | Pe        | <i>Cheilanthes glauca</i> (Cav.) Mett.                                                                                                                                  |
| APIACEAE         | Pe        | <i>Apium laciniatum</i> (DC.) Urban., <i>Apium leptophyllum</i> (Pers.) F.Muell ex Benth.                                                                               |
|                  | A         | <i>Cyclospermum laciniatum</i> (DC.) Constance.                                                                                                                         |
| ARISTOLOCHIACEAE | Pe        | <i>Aristolochia chilensis</i> Bridges ex Lindl.                                                                                                                         |
| ASTERACEAE       | A         | <i>Bidens pilosa</i> L., <i>Gamochaeta monticola</i> (Phil. ex Reiche) Cabrera., <i>Helenium aromaticum</i> (Hook.) L.H. Bailey., <i>Psilocarphus brevissimus</i> Nutt. |
|                  |           | <i>Amsinckia calycina</i> (Moris.) Chater., <i>Pectocarya linearis</i> (Ruiz et Pav) DC., <i>Plagiobothris gracilis</i> Ruiz et Pav.                                    |
| CARYOPHYLLACEAE  | Pe        | <i>Cardionema ramosissimum</i> (Weinm.), <i>Paronychia chilensis</i> DC.                                                                                                |
|                  |           | <i>Crassula connata</i> (Ruiz et Pav.) A.Berger, <i>Crassula peduncularis</i> (Sm.) F. Meigen.,                                                                         |
| CRASSULACEAE     | A         | <i>Crassula closiana</i> (Gay.) Reiche.                                                                                                                                 |
| CUCURBITACEAE    | A         | <i>Sicyos baderoa</i> Hook. et Arn.                                                                                                                                     |
| CUSCUTACEAE      | A         | <i>Cuscuta chilensis</i> Ker-Gawl.                                                                                                                                      |
| CYPERACEAE       | Pe        | <i>Carex</i> spp. L.                                                                                                                                                    |

|                   |      |                                                                                             |
|-------------------|------|---------------------------------------------------------------------------------------------|
| DENNSTAEDTIACEAE  | Pe   | <i>Hypolepis poeppigii</i> (Kunze.) R.A.Rodr.                                               |
| EPHEDRACEAE       | Ph   | <i>Ephedra chilensis</i> K. Presl.                                                          |
| HEMEROCALLIDACEAE | Pe   | <i>Pasithea coerulea</i> (Ruiz et Pav.) D. Don.                                             |
| JUNCACEAE         | A    | <i>Juncus bufonius</i> L.                                                                   |
| LILIACEAE         | Pe   | <i>Oziroë biflora</i> (R. et P.) Coc.                                                       |
| LORANTHACEAE      | Ph   | <i>Tristerix verticillatus</i> (Ruiz et Pav.) Barlow et Wiens.                              |
| MALESHERBIACEAE   | A    | <i>Malesherbia humilis</i> Poepp.                                                           |
| ONAGRACEAE        | A    | <i>Clarkia tenella</i> (Cav.) Lewis et M.R. Lewis.                                          |
| OXALIDACEAE       | A    | <i>Oxalis micrantha</i> Bertero ex Colla.                                                   |
| POACEAE           | A    | <i>Bromus berterianus</i> Colla., <i>Nasella chilensis</i> (Trin.) E. Desv.                 |
|                   | Pe   | <i>Jarava plumosa</i> Trin., <i>Jarava plumosa</i> (Spreng.) S.W. L. Jacobs et J. Ev.       |
| PORTULACACEAE     | A    | <i>Cistanthe arenaria</i> (Cham.) Carolin ex Hershk., <i>Calandrinia chrysantha</i> Johnst. |
| SANTALACEAE       | A    | <i>Quinchamalium chilense</i> Molina.                                                       |
| VERBENACEAE       | Pe-S | <i>Glandularia sulphurea</i> (D. Don.) Schnack et Covas.                                    |

Endemic species of IV Region of Chile detected during sampling (1983–2002) in CEALC (A: Annual, B: Biannual, Pe: Perennial, Ph: Phanerophyte, S: Subfruticose).

| Botanical Family | Life Form | Species                                                                                                                                                                 |
|------------------|-----------|-------------------------------------------------------------------------------------------------------------------------------------------------------------------------|
|                  |           | <i>Gethyum cuspidatum</i> (Harv. ex Baker.) M. Muñoz., <i>Leucocoryne coquimbensis</i> Phil.,<br><i>Leucocoryne macropetala</i> Phil., <i>Leucocoryne purpurea</i> Gay. |
| ALLIACEAE        | Pe        |                                                                                                                                                                         |
| ALSTROEMERIACEAE | Pe        | <i>Alstroemeria magnifica</i> Herb.                                                                                                                                     |
| AMARYLLIDACEAE   | Pe        | <i>Rhodophiala phycelloides</i> (Herb.) Hunz.                                                                                                                           |
| APIACEAE         | A         | <i>Eryngium coquimbantum</i> Phil. ex Urb.                                                                                                                              |
| ASTERACEAE       | S-Ph      | <i>Centaurea chilensis</i> Hook et Arn.                                                                                                                                 |
|                  | A         | <i>Chaetanthera linearis</i> Poepp. ex Less., <i>Microseris pygmaea</i> D. Don.,<br><i>Moscharia pinnatifida</i> Ruiz et Pav.                                           |
|                  | Ph        | <i>Ophryosporus paradoxus</i> Hook. et Arn., <i>Proustia cuneifolia</i> D. Don.,<br><i>Proustia ilicifolia</i> Hook et Arn.,                                            |
|                  | Pe        | <i>Senecio cummingii</i> Hook et Arn.                                                                                                                                   |
|                  | S         | <i>Senecio hackeifolius</i> Bertero ex DC.                                                                                                                              |
|                  |           | <i>Cryptantha linearis</i> (Colla.) Greene., <i>Cryptantha aprica</i> (Phil.) Reiche.,<br><i>Cryptantha glomerata</i> Lemh. ex Fisch. et C.A. Mey.,                     |
| BORAGINACEAE     | A         | <i>Pectocarya dimorpha</i> (I.M. Johnst.) I.M. Johnst., <i>Plagiobothris fulvus</i> Hook et Arn.                                                                        |
| CARYOPHYLLACEAE  | Pe        | <i>Corrigiola squamosa</i> Hook. et Arn.                                                                                                                                |
| CONVOLVULACEAE   | Pe        | <i>Convolvulus chilensis</i> Pers.                                                                                                                                      |
| DIOSCOREACEAE    | Pe        | <i>Dioscorea humifusa</i> Poepp.                                                                                                                                        |
| EUPHORBACEAE     | Pe        | <i>Euphorbia elquiensis</i> Phil.                                                                                                                                       |
| FABACEAE         | A         | <i>Adesmia filifolia</i> Clos., <i>Adesmia tenella</i> Hook. et Arn.                                                                                                    |
| LABIATAE         | Pe        | <i>Stachys grandidentata</i> Lindl.                                                                                                                                     |
|                  | A         | <i>Stachys truncata</i> Kunze ex Benth.                                                                                                                                 |
| LYTHRACEAE       | A         | <i>Pleurophora pusilla</i> Hook et Arn.                                                                                                                                 |
| MALVACEAE        | S         | <i>Sphaeralcea obtusiloba</i> (Hook.) G. Don.                                                                                                                           |
| OXALIDACEAE      | Pe        | <i>Oxalis maritima</i> Barnéoud.                                                                                                                                        |
|                  | A         | <i>Oxalis rosea</i> Jacq.                                                                                                                                               |
| PLANTAGINACEAE   | A         | <i>Plantago hispidula</i> Ruiz et Pav.                                                                                                                                  |
| POACEAE          | A         | <i>Vulpia eriolepis</i> (E.Desv) C.H.Blom.                                                                                                                              |
| POLYGONACEAE     | A         | <i>Lastarriaea chilensis</i> J. Remy.                                                                                                                                   |
|                  |           | <i>Cistanthe coquimbensis</i> (Barnéoud) Carolin ex Hershk.,                                                                                                            |
| PORTULACACEAE    | A         | <i>Cistanthe longiscapa</i> (Barnéoud) Carolin ex Hershk., <i>Montiopsis trifida</i> (Hook. et Arn.) D.I. Ford.                                                         |
| SOLANACEAE       | A         | <i>Schizanthus litoralis</i> Phil.                                                                                                                                      |

|                 |    |                                                                                       |
|-----------------|----|---------------------------------------------------------------------------------------|
|                 | S  | <i>Solanum pinnatum</i> Cav.                                                          |
| TECOPHILAEACEAE | Pe | <i>Conanthera campanulata</i> Lindl., <i>Tecophilaea violiflora</i> Bertero ex Colla. |
| VERBENACEAE     | Ph | <i>Junellia cinerascens</i> (Schauer.) Botta.                                         |
| VIOLACEAE       | A  | <i>Viola pusilla</i> Poepp.                                                           |
| VIVIANACEAE     | A  | <i>Araceoandra tenuicaulis</i> (Barnéoud.) Lefor.                                     |

Locations and characteristics of excluded areas in CEALC. See Figure 1 for an aerial image of part of these exclusions.

| Exclusion | Latitude/Longitude    | Altitude (m) | Slope Gradient (%) | Zone   | Size (ha) | Creation  |
|-----------|-----------------------|--------------|--------------------|--------|-----------|-----------|
| A         | -30.231325/-71.255883 | 240          | 1                  | Center | 53.72     | 1971–now  |
| B         | -30.243285/-71.272712 | 355          | 24                 | West   | 0.63      | 1983–2002 |
| C         | -30.242029/-71.239233 | 363          | 13                 | East   | 0.89      | 1983–now  |
| D         | -30.248078/-71.272498 | 313          | 27                 | West   | 0.30      | 1983–now  |
| E         | -30.248626/-71.256670 | 276          | 2                  | Center | 0.12      | 1983–now  |
| F         | -30.248541/-71.255124 | 274          | 2                  | Center | 0.46      | 1983–now  |
| G         | -30.249052/-71.243505 | 306          | 6                  | East   | 0.25      | 1983–1998 |
| H         | -30.250410/-71.260875 | 266          | 2                  | Center | 0.02      | 1983–now  |
| I         | -30.245120/-71.273754 | 411          | 28                 | West   | 0.06      | 1983–now  |
| J         | -30.266127/-71.244701 | 292          | 2                  | East   | 0.30      | 1983–2004 |
| K         | -30.251351/-71.256714 | 285          | 5                  | Center | 0.02      | 1983–now  |
| L         | -30.249001/-71.259079 | 269          | 3                  | Center | 0.57      | 1983–2002 |
